# Supplementary material for: The demographic history and adaptation of Canarian goat breeds to environmental conditions through the use of genome-wide SNP data
Source: PubMed Central journal article supplement (PMC10763158; doi:10.1186/s12711-023-00869-0), 2024-01-03

**Figure S1.** In each colored histogram, observed heterozygosity ( $H_o$ ), expected unbiased ( $uH_e$ ) heterozygosity and the inbreeding coefficient ( $F_{is}$ ) are respectively reported for each studied breed.

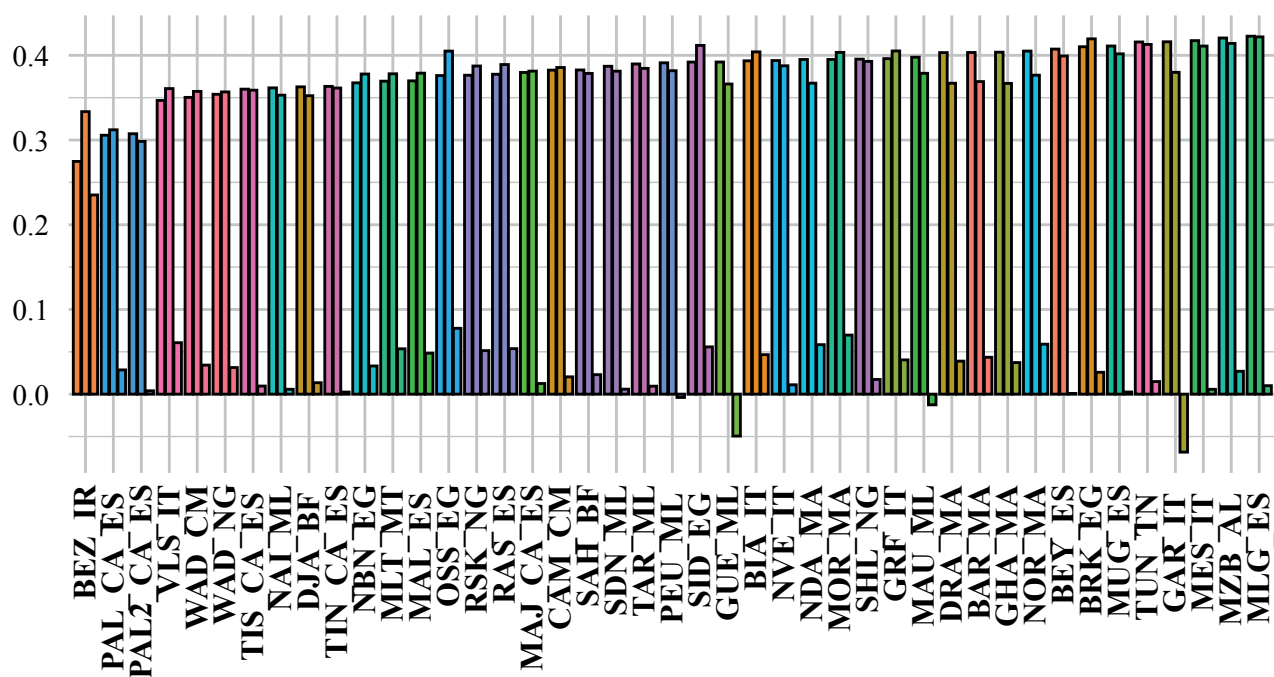

Supplement: 12711_2023_869_MOESM1_ESM.pdf [file 12711_2023_869_MOESM1_ESM.pdf]
