# Supplementary material for: The demographic history and adaptation of Canarian goat breeds to environmental conditions through the use of genome-wide SNP data
Source: PubMed Central journal article supplement (PMC10763158; doi:10.1186/s12711-023-00869-0), 2024-01-03

**Figure S2.** Inbreeding coefficients calculated using ROH (FROH) for each breed.

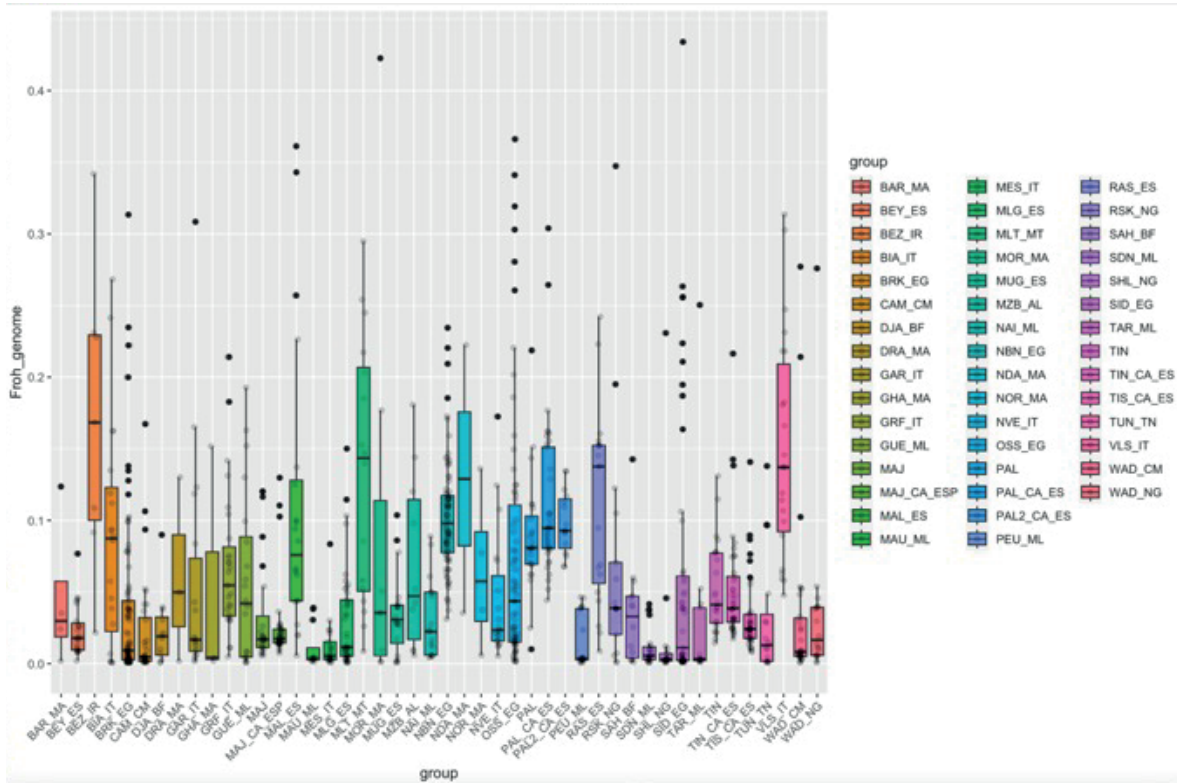

Supplement: 12711_2023_869_MOESM2_ESM.pdf [file 12711_2023_869_MOESM2_ESM.pdf]
